# Supplementary material for: LbCas12a-D156R Efficiently Edits LOB1 Effector Binding Elements to Generate Canker-Resistant Citrus Plants
Source: MDPI journal article supplement (doi:10.3390/cells11030315), 2022-01-18
Supplement: s1 [file s1]

GGATCCATGAGCAAGCTCGAGAAGTTTACCAACTGCTACAGCCTCTCTAAGACCCCTCAGGTTCAAGGCTATCCCTGTGGGAAAGACCCAAGAGAATATCGACAA  
 CAAGAGGCTCCTCGTCGAGGATGAGAAGAGAGCTGAAGATTACAAGGGCGTGAAGAAGCTCCTCGACAGGTACTACCTCAGTTTCATCAACGATGTGCTCCACA  
 GCATCAAGCTCAAGAACCTCAACAACCTACATCAGCCTCTTCCGTAAGAAAACCGAGACCGAGAAAAGAGAACAAGAGCTTGAGAACCTCGAGATCAACCTCCGT  
 AAAGAGATCGCCAAGGCTTTCAAGGGAAACGAGGGATACAAGAGCCTCTTCAAGAAGGATATTATCGAGACAATCCTGCCTGAGTTCTGACGATAAGGATGA  
 GATCGCTCTCGTGAACAGCTTCAACGGATTCACTACTGCCTTACCAGGATTCTTCCGTAACAGGGAAAACATGTTTCAGCGAAGAGGCCAAGAGCACCTCTATCGC  
 TTTCAGATGCATCAACGAGAACCTCACGCGTTACATCAGCAACATGGACATCTTCGAGAAGGTGGACGCCATCTTCGATAAGCACGAGGTGCAAGAAATCAAAG  
 AGAAGATCCTCAACAGCGACTACGACGTCGAGGACTTTTTTGAAGGGGAGTTCTTCAACTTCGTTCTCACCCAAGAGGGCATCGACGTGTACAACGCTATTATCG  
 GAGGATTCTGACCGAGTCTGGGGAGAAGATTAAGGGACTCAACGAGTACATCAACCTGTACAACCAGAAAACGAAGCAGAAGCTCCCGAAGTTCAAGCCGCT  
 CTACAAGCAGGTTCTCTCTGATCGTGAGAGCCTCTCATTTTACGGTGAGGGTTACACCTCTGACGAGGAAGTGCTTGAGGTTTTCCGTAACACCCTCAACAAGAA  
 CAGCGAGATCTTCTCGTCCATCAAGAAGTTGGAGAAGCTTTTCAAGAACTTCGACGAGTACAGCAGCGCTGGGATCTTCGTTAAGAACGGACCTGCTATCAGCAC  
 CATCAGCAAGGATATTTTCGGCGAGTGGAACGTGATCAGGGACAAGTGGAATGCTGAGTACGATGACATCCACCTCAAGAAGAAGGCTGTCGCTACTGAGAAGT  
 ACGAGGATGACAGGCGTAAGTCGTTCAAGAAGATCGGCTCTTTCAGCCTCGAGCAGCTTCAAGAATACGCTGATGCTGATCTCAGCGTGGTCGAGAAGCTCAAA  
 GAGATCATCATCCAGAAGGTCGACGAGATCTACAAGGTGTACGGGTCCTCTGAGAAGTTGTTTCGATGCTGATTTTCGTCCTCGAGAAGAGTCTGAAGAAGAACGA  
 CGCTGTCTGTCGCGATCATGAAGGATTGCTCGACAGCGTGAAGTCCTTCGAGAACTATATCAAGGCCTTCTTCGGAGAGGGCAAAGAGACTAATAGGGACGAGT  
 CTTTCTACGGGGATTTCTGTCTCGCTTACGATATCCTCCTCAAGGTGGACCATATCTACGACGCCATCAGAACTACGTGACCCAGAAGCCTTACAGCAAGGACA  
 AGTTCAAGTTGTACTTTTCAAGACCCGCAGTTTCATGGGCGGATGGGACAAAAGACAAAGAGACAGATTACAGGGCCACCATCCTCAGGTACGGGTCTAAGTACTAC  
 CTGGCCATCATGGACAAGAAATACGCCAAGTGCCTCCAAAAGATCGACAAGGATGACGTGAACGGGAACTATGAGAAGATCAACTACAAGCTCCTTCCGGGACC  
 GAACAAGATGCTTCCTAAGGTGTTCTTCAGCAAGAAATGGATGGCCTACTACAACCCGTCTGAGGACATCCAGAAAATCTACAAGAACGGGACCTTCAAGAAAAG  
 GCGACATGTTCAACCTCAACGACTGCCACAAGCTCATCGATTTCTTCAAGGACAGCATCTCGCGTTACCCGAAAGTGGTCTAACGCTTACGACTTTAACTTCAGCG  
 AGACAGAAAAGTACAAGGATATCGCCGGGTTCTACCGTGAGGTTGAGGAACAGGGTTACAAGGTTAGCTTCGAGAGCGCCTCCAAGAAAGAGGTTGACAAGTT  
 GGTCTGAAGAGGGCAAGCTCTACATGTTCCAGATCTATAACAAGGACTTCTCCGACAAGAGCCACGGAACCTCCTAACCTCCATACGATGTACTTCAAGCTGCTTTT  
 CGACGAGAACAACCACGGGCAGATCAGACTTTCTGGTGGTGCTGAACTCTTCATGCGTAGGGCCTCACTCAAGAAAGAAGAGTTGGTTGTTACCCGGCCAACCTC  
 TCCAATCGCTAACAAGAATCCTGACAACCCGAAAAAGACCACCACGCTGTCTTACGACGTCTACAAGGACAAAAGGTTTCAGCGAGGACCAGTACGAGCTTCATA  
 TCCCGATCGCTATCAACAAGTGCCCGAAGAACATCTTCAAGATCAATACCGAGGTGAGGGTGCTGCTCAAGCACGATGATAACCCTTACGTGATCGGAATCGATC  
 GTGGTGAGAGAAACCTCCTCTACATCGTTGTGGTGAGCGGAAAGGGAACATCGTCGAGCAGTACAGCCTGAACGAGATTATCAACAATTTCAACGGCATCAGG  
 ATCAAGACCGACTACCACTCACTCCTCGATAAGAAAGAAAAAGAGCGTTTCGAGGCCAGGCAGAACTGGACTTCTATCGAAAACATCAAAGAGTTGAAGGCCGG  
 CTACATCTCTCAGGTGGTGCATAAGATCTGCGAGCTGGTGGAAGTACGATGCTGTGATCGCTCTTGAGGACCTCAACTCTGGGTTCAAGAACAGTAGAGTGAA  
 GGTTGAGAAGCAGGTCTACCAAAGTTTCGAGAAGATGCTCATCGACAAGCTCAACTACATGGTGGAACAAAAGAGCAACCCCTTGCGCTACCGGTGGTGCTCTTA  
 AGGGATACCAGATCACGAACAAGTTTCGAGTCCTTCAAGAGCATGAGCACCCAGAACGGCTTCATCTTCTATATCCCTGCTTGCTCACCAGCAAGATCGATCCTT  
 CTACTGGTTTTCTGTAACCTGCTCAAGACCAAGTACACCTCGATCGCCGACAGCAAGAAGTTTCATCTCGTCTTTTCGACAGGATCATGTACGTGCCGGAAGAGGATC  
 TTTTCGAGTTTCGCTCTCGACTATAAGAACTTCAGCAGGACCGACGCCGACTACATTAAGAAGTGGAAGCTCTACTCCTACGGGAACCGTATCAGGATCTTCCGAA  
 ATCCGAAGAAAAACAACGTGTTTCGACTGGGAAGAAGTGTGCCTCACCTCTGCCTACAAAGAAGTGTTCACAAAGTACGGCATCAACTACCAGCAGGGTGATATC  
 AGGGCTCTTTGTGCGAGCAGAGCGACAAGGCATTCTACAGCTCATTCATGGCCCTCATGTCTCTCATGCTCCAGATGAGGAACTCTATACCCGGAAGGACCGAT  
 GTGGACTTCCTTATCTCTCCGGTCAAGAACTCTGACGGGATCTTCTACGACAGCCGTAACCTATGAGGCTCAAGAGAACGCTATCCTGCCGAAGAATGCTGATGCA  
 AACGGGGCTTACAACATTGCGAGAAAGTTCTCTGGGCTATCGGGCAGTTTAAGAAAGCGGAAGATGAGAAGCTGGACAAGGTGAAGATCGCCATCTCCAACA  
 AAGAGTGGCTTGAGTACGCTCAGACCTCCGTTAAGCACAAGAGGCCTGCTGCTACTAAGAAAGCTGGTCAGGCTAAGAAGAAGAAATTAGAATTC

**Supplementary Figure S1. ttLbCas12a sequence.** A temperature-tolerant LbCas12a variant (ttLbCas12a) harbors the single mutation D156R, which is indicated in purple. Restriction Digestion Enzyme sites *Bam*HI and *Eco*RI are underlined. Translation start codon and end codon are highlighted in green and red, respectively.

- (A) CTCGAGTCGTTGAACAACGGAAACTCGACTTGCCTTCCGCACAATACATCATTTCTTCTTAGCTTTTTTTCTT  
CTTCTTCGTTTCATACAGTTTTTTTTTTGTTTATCAGCTTACATTTTCTTGAACCGTAGCTTTCGTTTTCTTCTTTT  
 TAACTTTCCATTCGGAGTTTTTGTATCTTGTTTCATAGTTTGTCCCAGGATTAGAATGATTAGGCATCGAACC  
 TTCAAGAATTTGATTGAATAAAACATCTTCATTCTTAAGATATGAAGATAATCTTCAAAGGCCCTGGGAAT  
 CTGAAAGAAGAGAAGCAGGCCCATTTATATGGGAAAGAACAATAGTATTTCTTATATAGGCCCATTTAAGTT  
 GAAAACAATCTTCAAAGTCCACATCGCTTAGATAAGAAAACGAAGCTGAGTTTATATACAGCTAGAGTC  
 GAAGTAGTGATTGAAATTACTGATGAGTCCGTGAGGACGAAACGAGTAAGCTCGTC
- (B) ACACCTTGGTAATTTTGACATTAGGTAGCAATATAATACGATAAAATTCACCTCCATGTAATTTGAAGTTCTTT  
 TCAATAATTTTTTTGACAAATTTTATAGAAGAATTTAACCTTTTCTTTTTTTTTTTCAAACGAAGAAATGTTTT  
 CGTCATTCAATTAAAATTAATGACATCATCTAGTGGCTTGGTGACATACGCTTTAGATACAATTGTCATTCTTG  
 CCTTTTCTTTCTCTATATAAACCCCTTTTGCCTTAACTTTGTTTCAACTAAAGCAGCTCCTCCTCATCCCTTA  
 CTGTCTTCGCTTTCTCACTAACTACTACAACCCAACAGTTTTCTTCTCTCAAAA

**Supplementary Figure S2. Part of pUC57-AtU6-26-crRNA:LOBP sequence (A) and Type II CsLOBP in Pummelo (B).** Hammerhead ribozyme and hepatitis delta virus ribozyme are shown in yellow and gray, respectively. EBE<sub>PthA4</sub>-CsLOBP is indicated in red. Artificial dTALE dCsLOB1.5 binding site is highlighted in green. The crRNA targeting site is indicated by blue rectangle. Enzyme sites *Xho*I and *Sac*I are underlined.

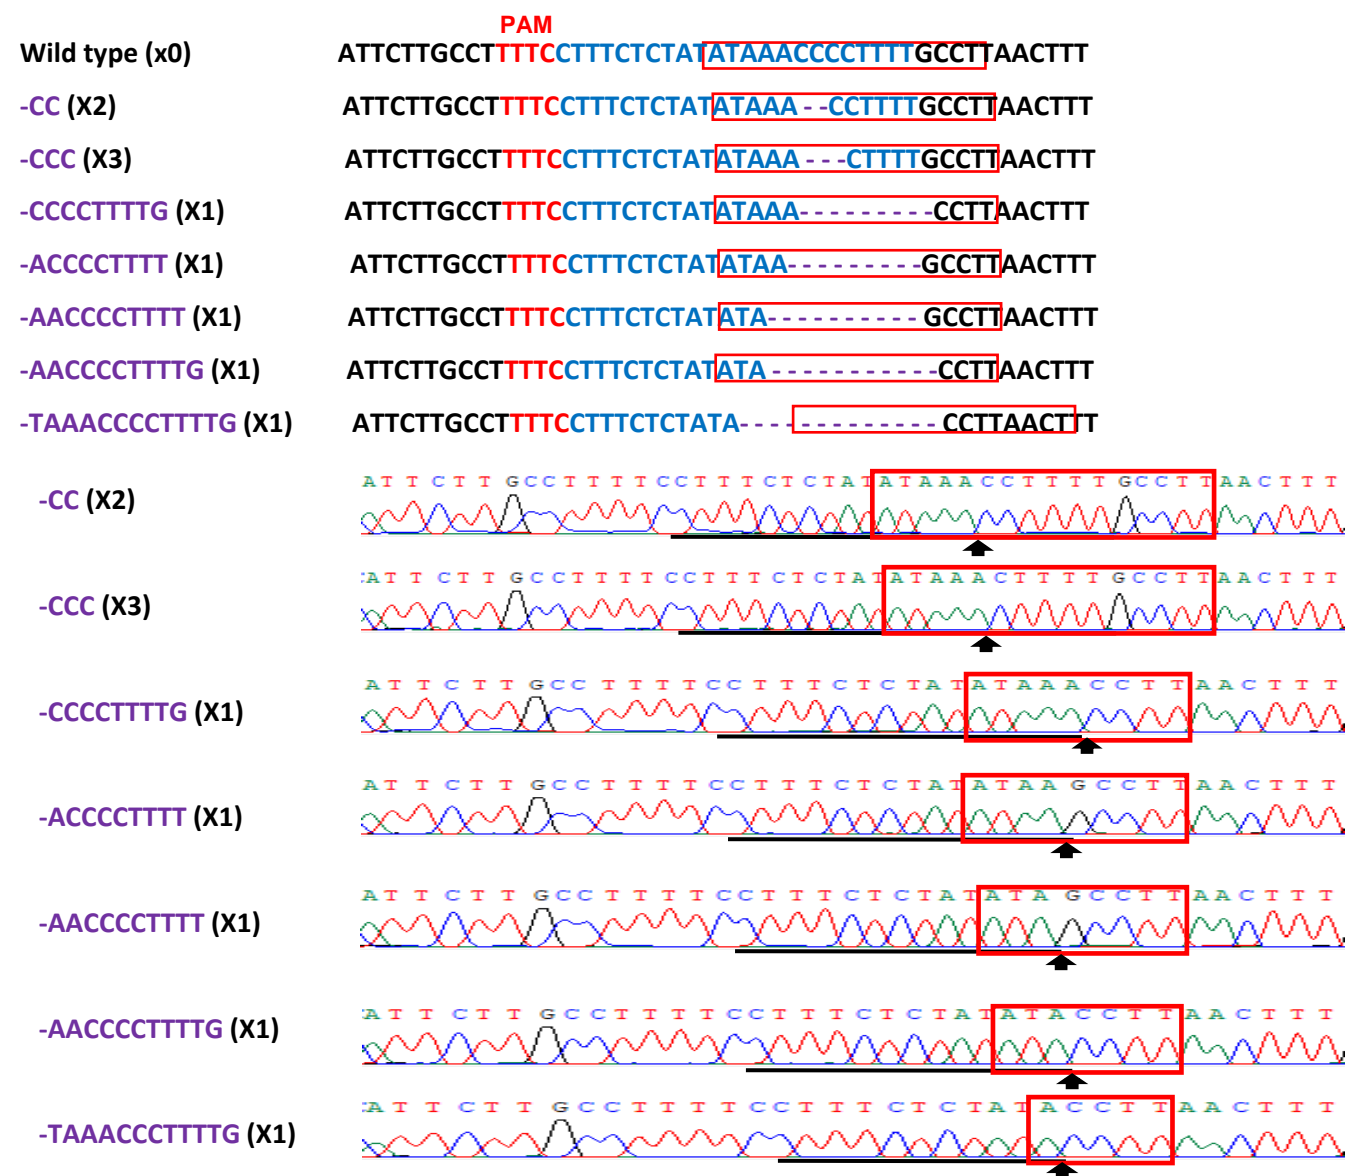

**Supplementary Figure S3. Sanger sequencing results of LOBP-edited Pummelo line #Pum<sub>tt</sub>1.** Using #Pum<sub>tt</sub>1 genomic DNA as template, PCR products were amplified with LOBP2 and LOBP5. After ligation, 10 colonies were randomly selected, sequenced and analyzed. The targeted sequence is shown in blue, and the mutations are shown in purple. EBE<sub>PthA4</sub>-CsLOBP is highlighted by red rectangles. The targeted sequence is underlined by black lines, and the mutant sites are indicated with arrows.

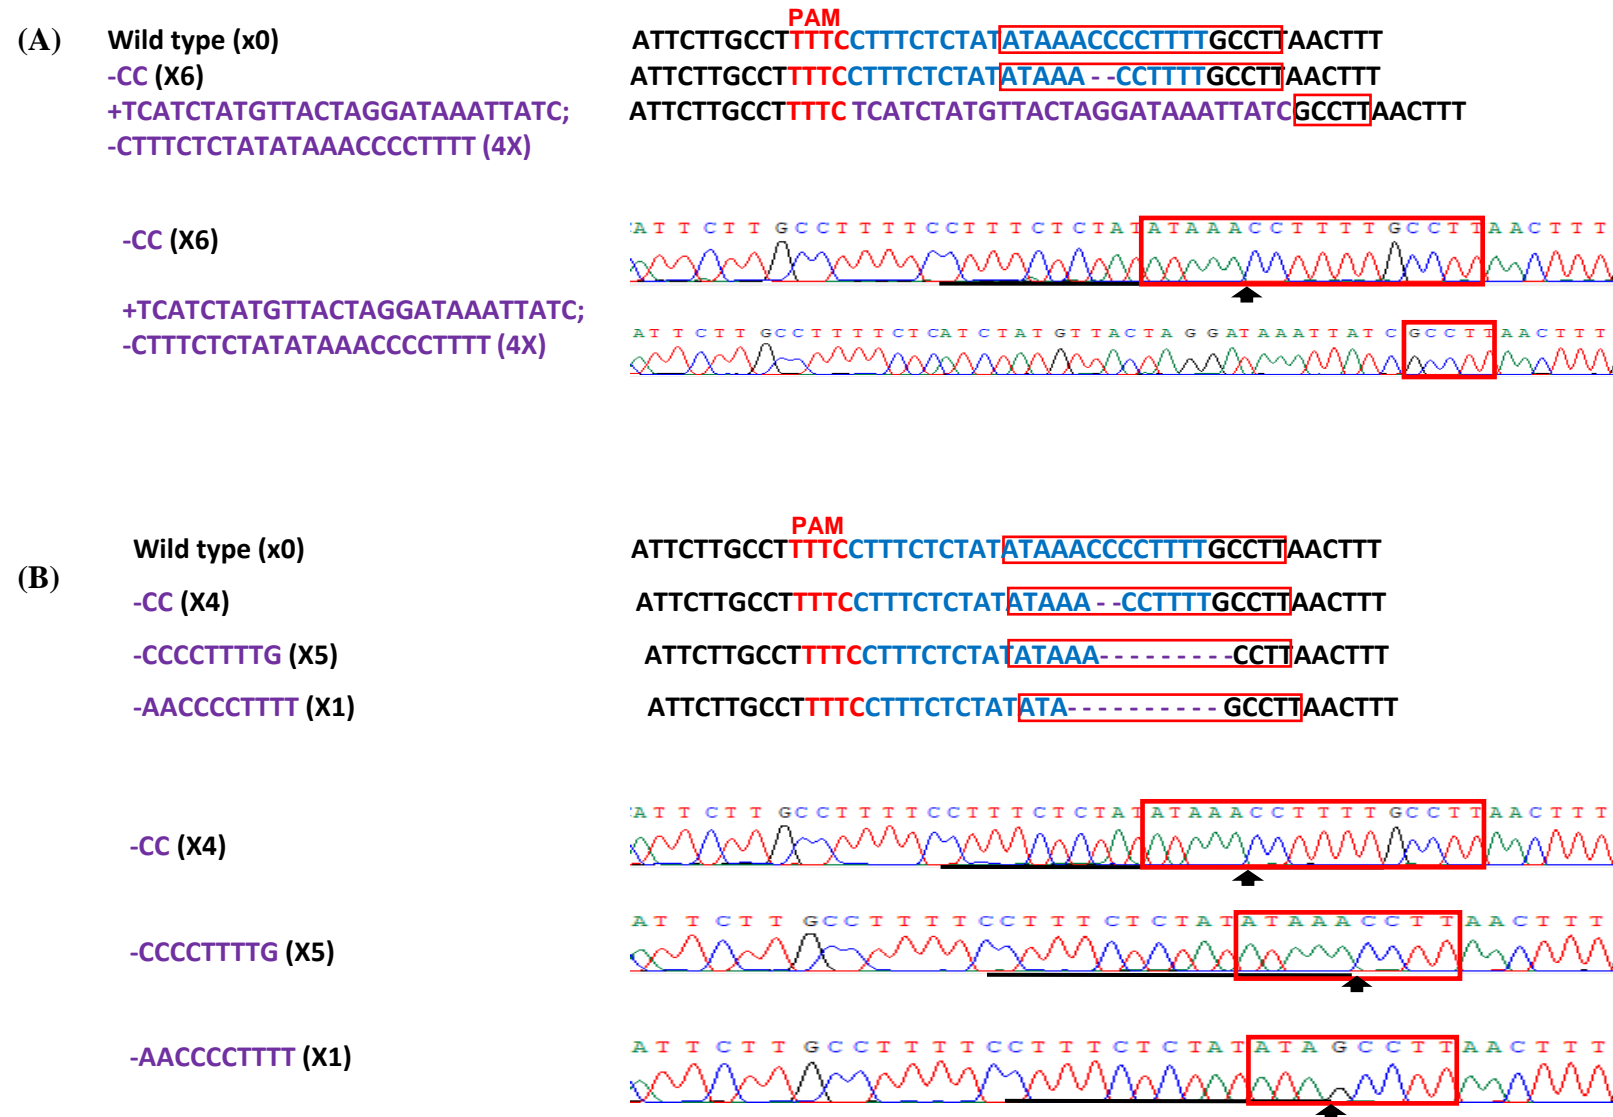

**Supplementary Figure S4. Sequence results of LOBP-edited Pumelo lines #Pum<sub>t</sub>3 (A) and #Pum<sub>t</sub>4 (B).** Using genomic DNA of #Pum<sub>t</sub>3 or #Pum<sub>t</sub>4 as template, PCR products were amplified with LOBP2 and LOBP5. After ligation, 10 colonies were randomly selected, sequenced and analyzed. The targeted sequence is shown in blue, and the mutations are shown in purple. EBE<sub>PthA4</sub>-CsLOBP is highlighted by red rectangles. The targeted sequence is underlined by black lines, and the mutant sites are indicated with arrows.

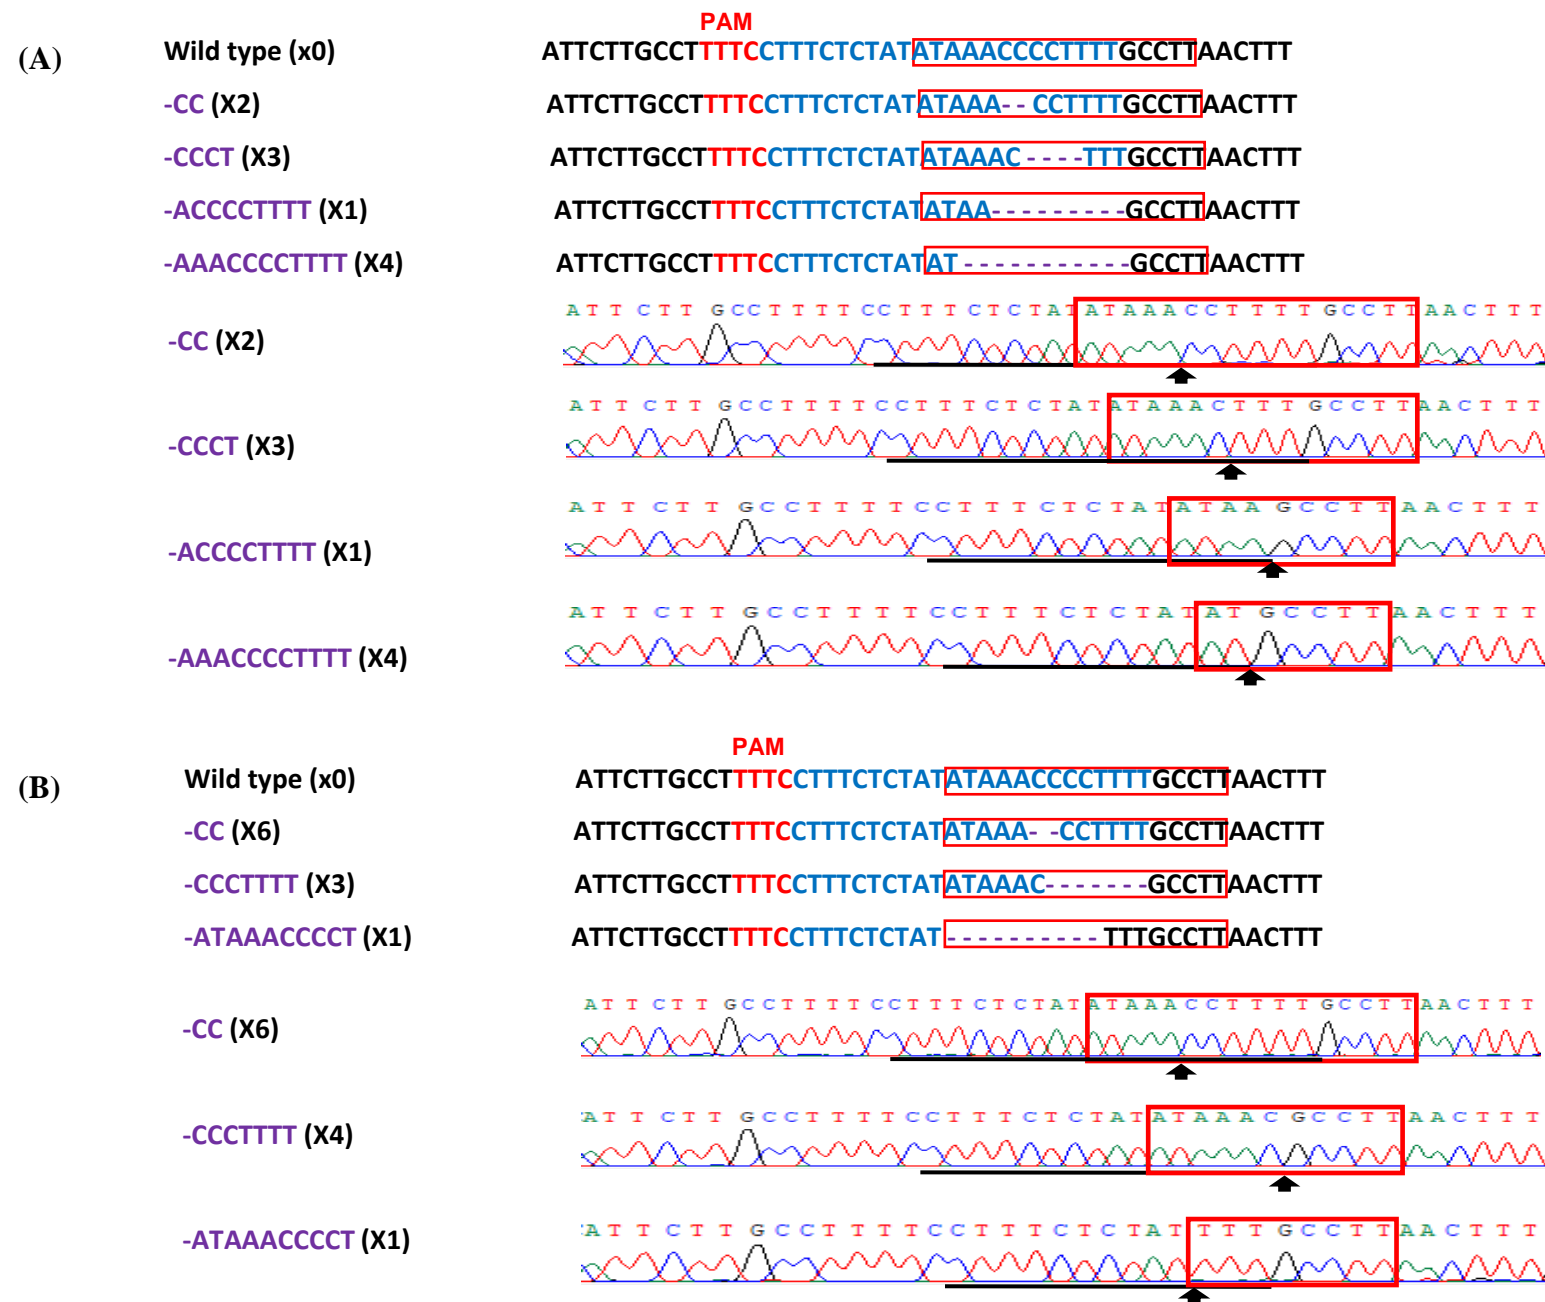

**Supplementary Figure S5. Sequence results of LOBP-edited Pummelo lines #Pum<sub>5</sub> (A) and #Pum<sub>6</sub> (B).** Using genomic DNA of #Pum<sub>5</sub> or #Pum<sub>6</sub> as template, PCR products were amplified with LOBP2 and LOBP5. After ligation, 10 colonies were randomly selected, sequenced and analyzed. The targeted sequence is shown in blue, and the mutations are shown in purple. EBE<sub>PthA4</sub>-CsLOBP is highlighted by red rectangles. The targeted sequence is underlined by black lines, and the mutant sites are indicated with arrows.

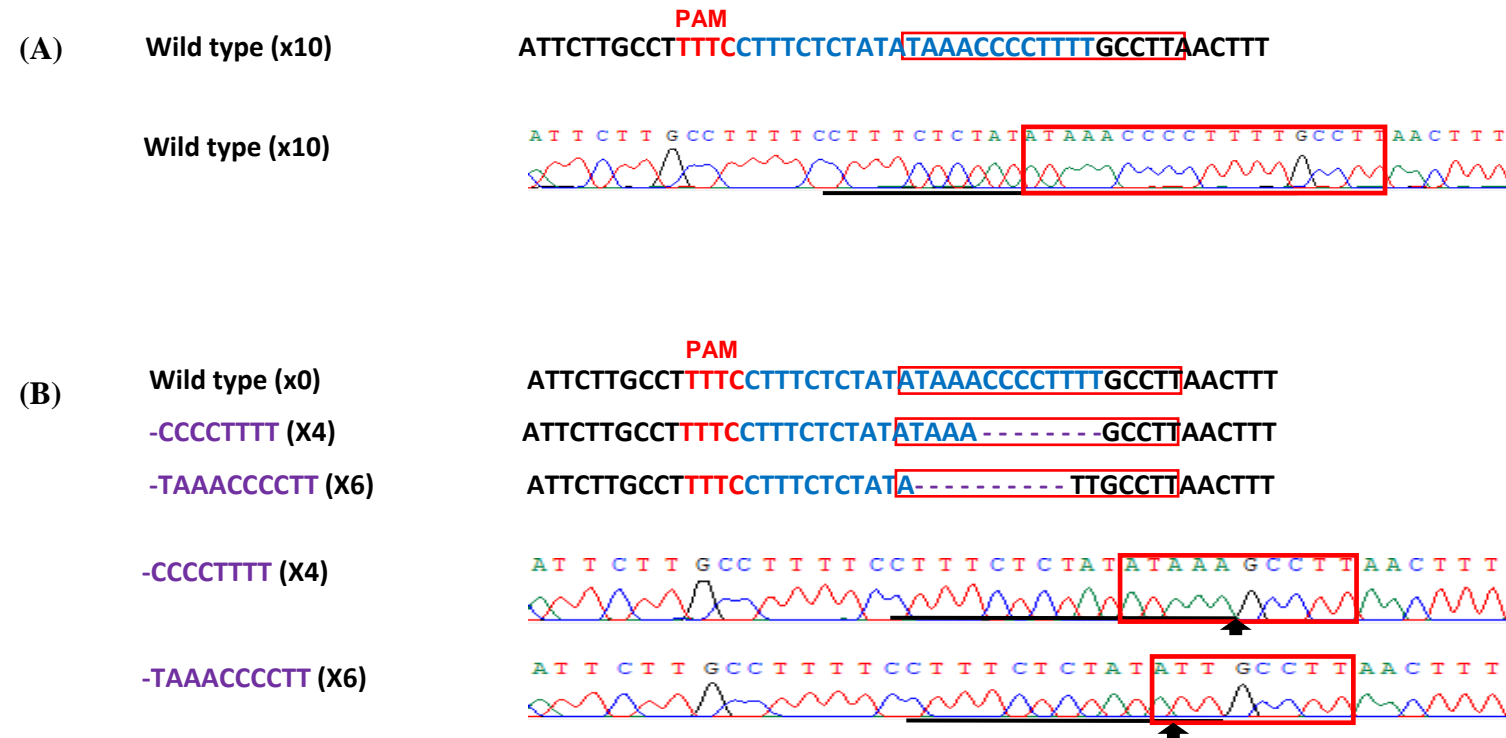

**Supplementary Figure S6. Sequence results of LOBP-edited Pumelo lines #Pum<sub>t</sub>7 (A) and #Pum<sub>t</sub>8 (B).** Using genomic DNA of #Pum<sub>t</sub>7 or #Pum<sub>t</sub>8 as template, PCR products were amplified with LOBP2 and LOBP5. After ligation, 10 colonies were randomly selected, sequenced and analyzed. The targeted sequence is shown in blue, and the mutations are shown in purple. EBE<sub>PthA4</sub>-CsLOBP is highlighted by red rectangles. The targeted sequence is underlined by black lines, and the mutant sites are indicated with arrows.

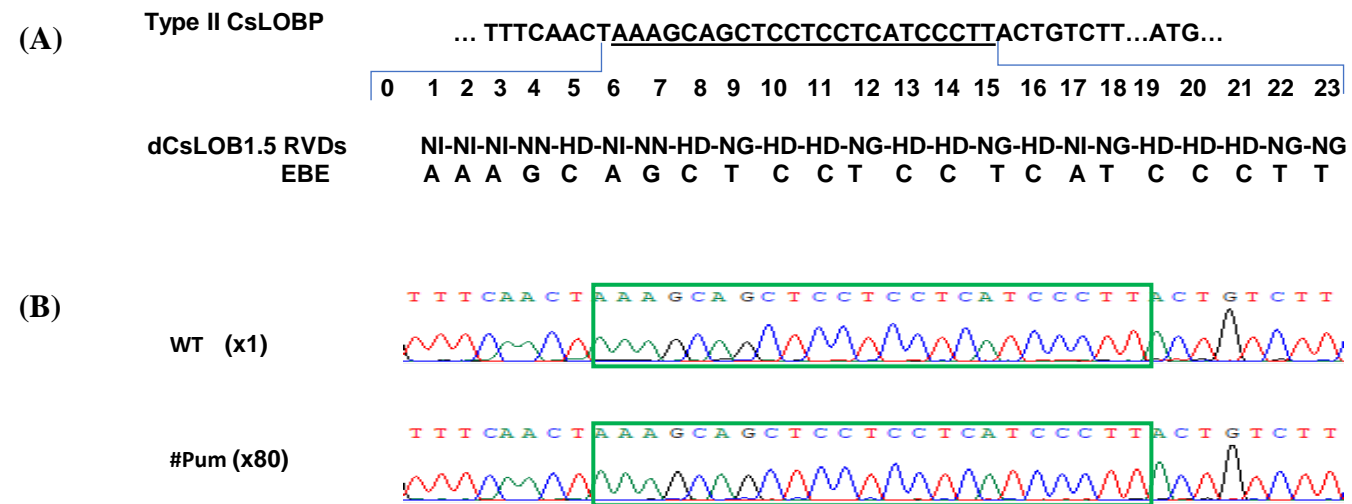

**Supplementary Figure S7. dCsLOB1.5 and its representative chromatograms in Pummelo.** (A) dCsLOB1.5 is an artificial dTALE, which specifically recognizes AAAGCAGCTCCTCCTCATCCCTT. (B) Representative chromatograms of dCsLOB1.5-binding sequence, which is the same in wild type and transgenic Pummelo plants. The dCsLOB1.5-binding sequence is highlighted by green rectangles.

Bulge Type▼

DNA bulge▼

RNA bulge▼

3▼

Filter

Download filtered result

| Bulge Type | Target                                                              | Chromosome  | Position | Direction | Mismatches | Bulge Size |
|------------|---------------------------------------------------------------------|-------------|----------|-----------|------------|------------|
| X          | crRNA: TTTVCTTTCTATATAAACCCCTTTT<br>DNA: TTTCTTTCTCTATATAAACCCCTTTT | NC_023052.1 | 28359397 | -         | 0          | 0          |

**Supplementary Figure S8. Off-targets of GFP-p1380N-ttLbCas12a:LOBP crRNA.** A web software (<http://www.rgenome.net/cas-offfinder/>) was used to analyze off-targets induced by GFP-p1380N-SpCas9p:PumLOBP crRNA. No potential off-targets were identified when up to 3 bp mismatches with the targeting crRNA were used for searching.
